# Supplementary material for: Differential expression of tissue-restricted antigens among mTEC is associated with distinct autoreactive T cell fates
Source: PubMed Central journal article supplement (PMC7381629; doi:10.1038/s41467-020-17544-3), 2020-07-24
Supplement: 41467_2020_17544_MOESM1_ESM.pdf [file 41467_2020_17544_MOESM1_ESM.pdf]

Supplementary information

**Differential expression of tissue-restricted antigens among mTEC is associated with distinct autoreactive T cell fates**

Lebel *et al.*

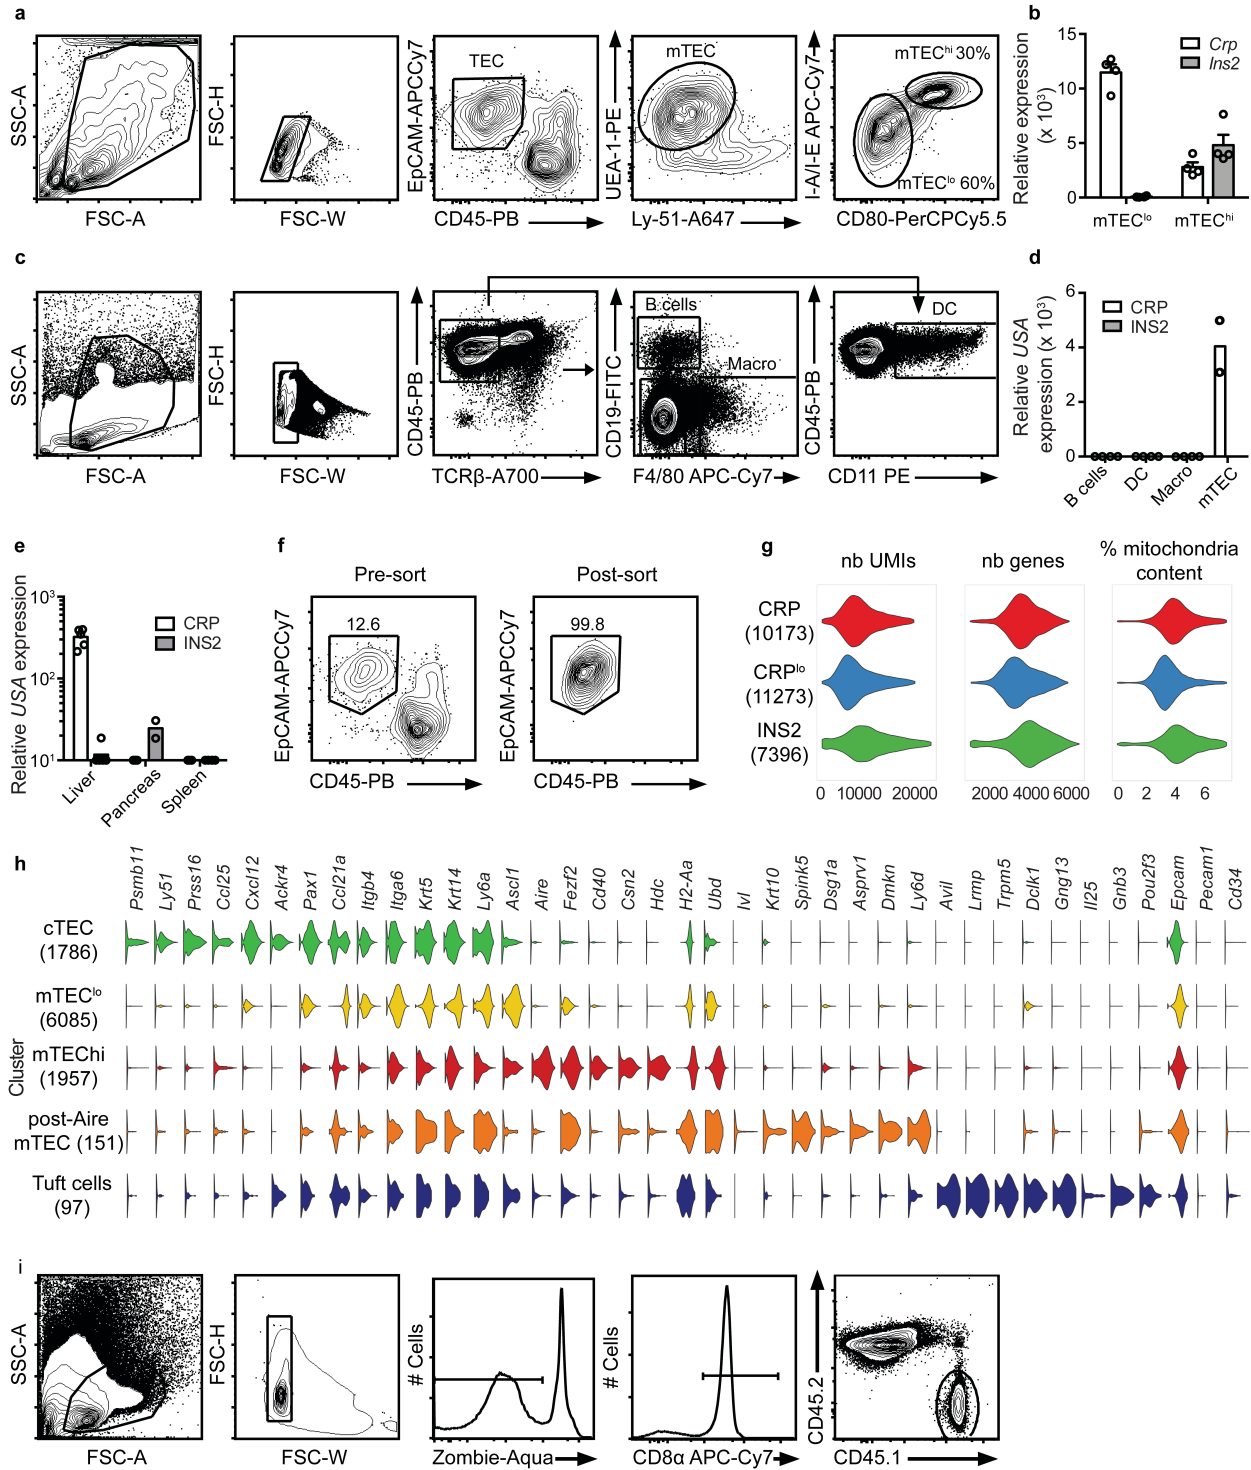

**Supplementary Fig. 1.** Differential expression of tissue-restricted antigens among mTEC subsets. **(a)** Gating strategy for sorting thymic epithelial cells (TEC) (EpCAM<sup>+</sup>CD45<sup>+</sup>), total medullary thymic epithelial cells (mTEC) (EpCAM<sup>+</sup>CD45<sup>+</sup>UEA-1<sup>+</sup>Ly51<sup>-</sup>), mTEC<sup>hi</sup> (EpCAM<sup>+</sup>CD45<sup>+</sup>UEA-1<sup>+</sup>Ly51<sup>-</sup>I-AI-E<sup>hi</sup>CD80<sup>hi</sup>), and mTEC<sup>o</sup> (EpCAM<sup>+</sup>CD45<sup>+</sup>UEA-1<sup>+</sup>Ly51<sup>-</sup>I-AI-E<sup>o</sup>CD80<sup>o</sup>) cells for qPCR analysis presented in Fig. 1b-d and Supplementary Fig.1b, single-cell RNA sequencing data presented in Fig. 1e-i and Supplementary Fig. 1g,h and *in vitro* culture experiment in Supplementary Fig. 3e,f. **(b)** Relative expression of *Crp* and *Ins2* in sorted mTEC<sup>o</sup> and mTEC<sup>hi</sup> cells from WT mice. The thymus from 3 mice were pooled prior to sorting (mean

+/- SEM, n = 4 experiment per group). (c) Gating strategy for sorting thymic B cells (CD45<sup>+</sup>TCRβ<sup>-</sup>CD19<sup>+</sup>), dendritic cells (CD45<sup>+</sup>TCRβ<sup>-</sup>CD11c<sup>+</sup>), and macrophages (CD45<sup>+</sup>TCRβ<sup>-</sup>F4/80<sup>+</sup>) for qPCR analysis presented in Supplementary Fig. 1d. (d) Relative *USA* expression in sorted thymic B cells, dendritic cells (DC), and macrophages (Macro) from CRP and INS2 Tg mice. mTEC from CRP Tg mice were included as a positive control (n = 2 mice per group). (e) Relative *USA* expression in the liver (n = 5 mice per group), the pancreas (n = 3 CRP and 2 INS2 mice), and the spleen (n = 3 CRP and 4 INS2 mice) from CRP and INS2 Tg mice. (f) Representative purity assessment before and after sort for single-cell RNA sequencing of CRP, CRP<sup>0</sup>, and INS2 Tg mice. (g) Distribution of quality control statistics per cell for the three transgenic mice. Number of sequenced cells are indicated in parentheses. UMIs, Unique Molecular Identifiers. Data are from one experiment with one mouse per group. (h) Gene expression distribution for selected cell type specific canonical markers of TEC isolated from CRP Tg mice. Number of cells are indicated in parentheses. Violins are colored by label and scaled to the same width. (i) Gating strategy for the analysis of the OT-I cells (CD8<sup>+</sup>CD45.1<sup>+</sup>) overlaid in the thymic slices presented on Fig. 1j-m. Source data are provided as a Source Data file.

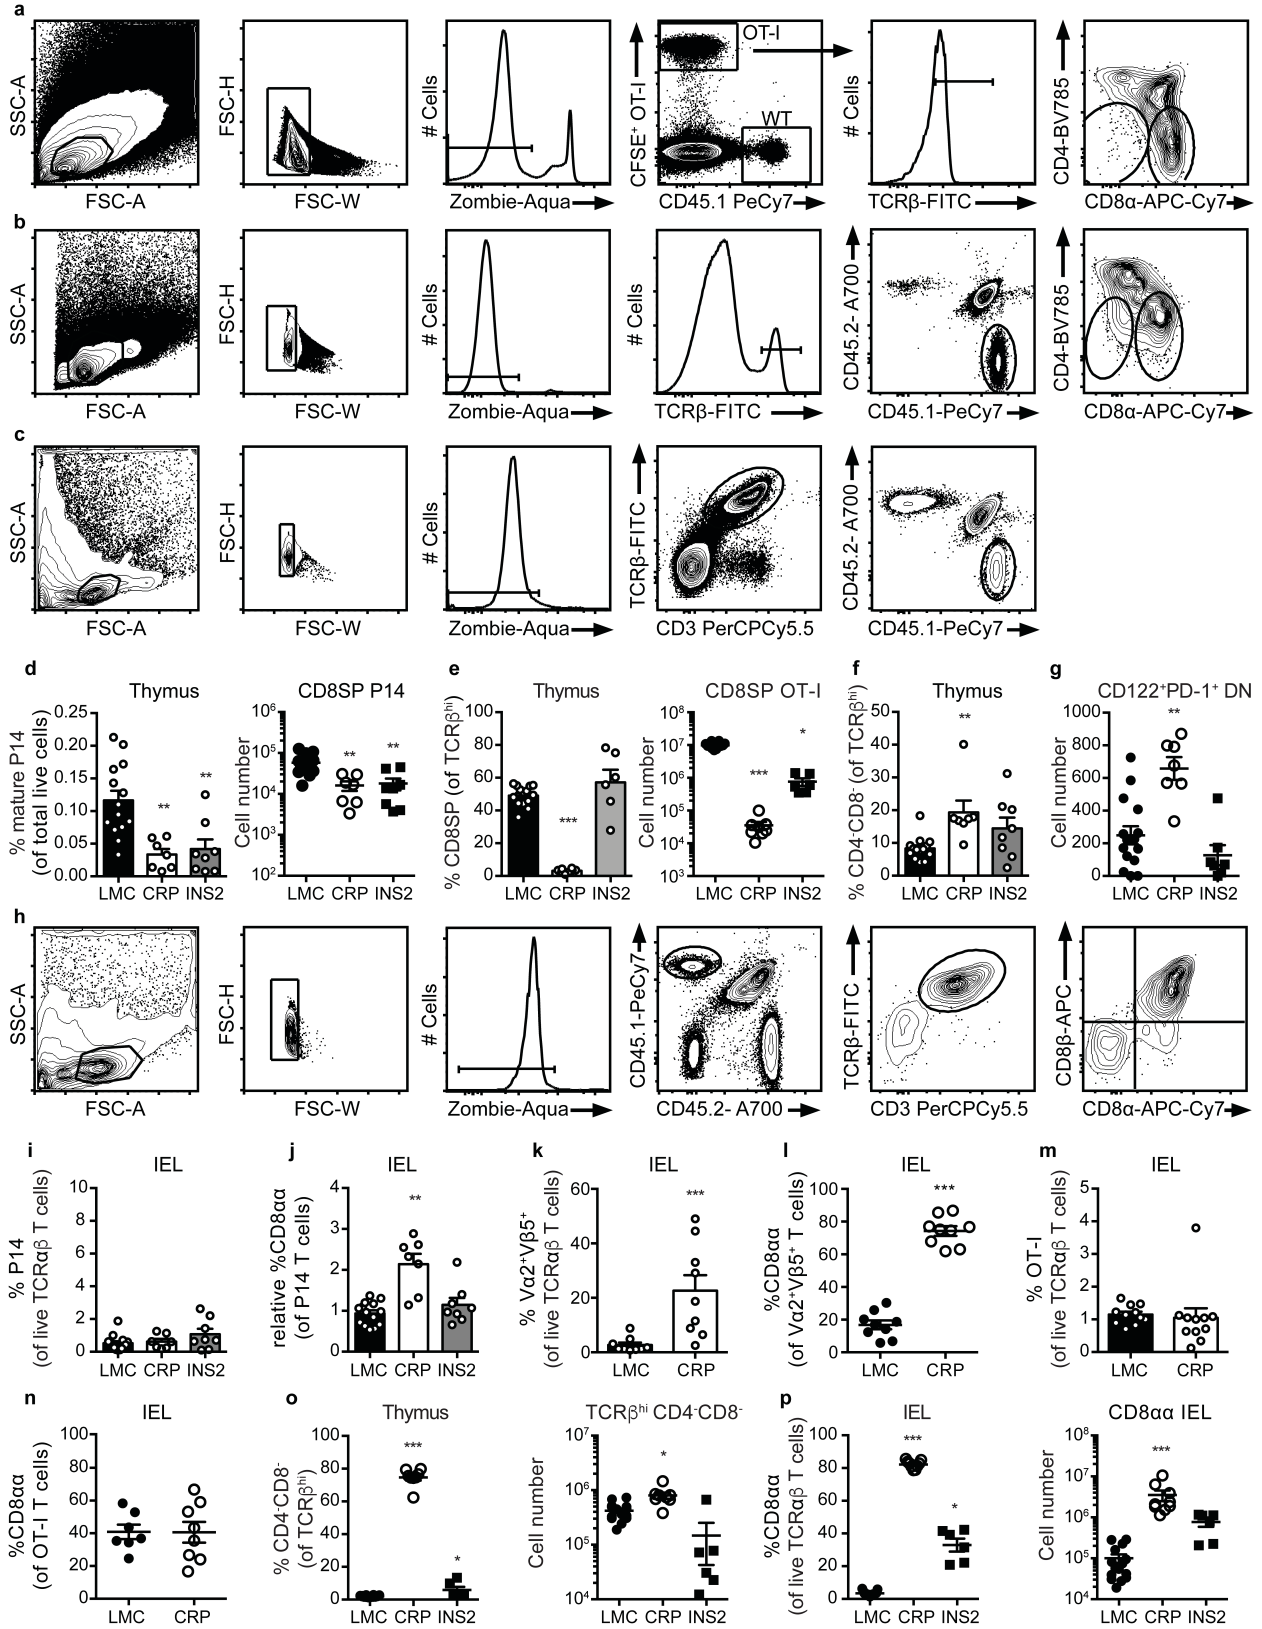

**Supplementary Fig. 2.** Developmental fate of MHC class I-restricted autoreactive T cells in CRP and INS2 Tg mice. **(a)** Gating strategy for the analysis of OT-I thymocytes (CFSE<sup>+</sup>CD45.1<sup>-</sup>) overlaid on thymic slices presented in Fig. 2a-d and Fig. 3a-d. **(b-d and f-j)** Littermate control (LMC), CRP, and INS2 recipient mice (CD45.2) were irradiated and reconstituted with 1% TCR Tg (CD45.1) and 99% WT (CD45.1.2) bone marrow. Gating strategy for the analysis of TCR Tg (TCRβ<sup>+</sup>CD45.1<sup>+</sup>CD45.2<sup>-</sup>) cells in the thymus **(b)** (Fig. 2e, Fig. 3e,f and I and Supplementary Fig. 2d-g and o) and the lymph nodes **(c)** (Fig. 2f). **(d)** Flow cytometry analysis of the proportion (left panel) and cell number (right panel) of mature TCRβ<sup>hi</sup> CD8<sup>+</sup> SP P14 thymocytes (mean +/- SEM, n = 14 LMC, 7 CRP, and 8 INS2 mice). **(e)** CRP and INS2 Tg mice were crossed to OT-I TCR Tg mice. Flow cytometry analysis of the proportion (left panel) and number (right panel) of mature TCRβ<sup>hi</sup> CD8<sup>+</sup> SP OT-I thymocytes (mean +/- SEM, n = 14 LMC, 8 CRP, and 6 INS2 mice). **(f)** Compilation of the proportion of CD4<sup>+</sup>CD8<sup>-</sup> cells within the live TCRβ<sup>hi</sup> P14 thymocyte population and **(g)** number of CD122<sup>+</sup>PD-1<sup>+</sup> DN P14 cells. **(h)** Gating strategy for the analysis of TCR Tg (TCRβ<sup>+</sup>CD45.1<sup>+</sup>CD45.2<sup>-</sup>) cells in the intraepithelial lymphocytes of the small intestine (Fig. 3g-k and Supplementary Fig. 2i-n and p). Proportion of P14 cells of TCRαβ intraepithelial lymphocytes (IEL) from the small intestine **(i)** and the proportion of TCRαβ<sup>+</sup> CD8αα cells of P14 T cells **(j)** (f-j, mean +/- SEM, n = 14 LMC, 7 CRP, and 8 INS2 mice). **(k, l)** LMC and CRP recipient mice (CD45.1.2) were irradiated and reconstituted with 1% OT-I β2M<sup>-/-</sup> (CD45.2, Vα2<sup>+</sup>Vβ5<sup>+</sup>) and 99% β2M<sup>-/-</sup> (CD45.2) bone marrow, and the proportion of Vα2<sup>+</sup>Vβ5<sup>+</sup> cells within the TCRαβ IEL from the small intestine **(k)** and the proportion of TCRαβ<sup>+</sup> CD8αα IEL of Vα2<sup>+</sup>Vβ5<sup>+</sup> T cells **(l)** were analyzed 6-8 weeks post-reconstitution (mean +/- SEM, n = 9 mice per group). Mature OT-I T cells were adoptively transferred into LMC and CRP mice, and the proportion of OT-I T cells of TCRαβ IEL **(m)** (mean +/- SEM, n = 11 mice per group) and the proportion of TCRαβ<sup>+</sup> CD8αα cells of OT-I T cells **(n)** (mean +/- SEM, n = 7 LMC and 8 CRP mice) were analyzed 6-8 weeks post-transfer. CRP and INS2 Tg mice were crossed to OT-I TCR Tg mice and **(o)** the proportion (left panel) and absolute number (right panel) of TCRβ<sup>hi</sup>CD4<sup>+</sup>CD8<sup>-</sup> DN cells (mean +/- SEM, n = 14 LMC, 8 CRP, and 6 INS2 mice) as well as **(p)** the proportion (left panel) and absolute number (right panel) of CD8αα IEL were analyzed (mean +/- SEM, n = 15 LMC, 9 CRP, and 6 INS2 mice). Data are pooled from two to three independent experiments. Statistical analyses were performed by Kruskal-Wallis test followed by Dunn's post-hoc comparisons to LMC, two-sided **(d-g, i, j, o, p)** and two-tailed Mann-Whitney U test **(k-n)**. \*p < 0.05, \*\*p < 0.01, \*\*\*p < 0.001 as compared to LMC. Source data are provided as a Source Data file.

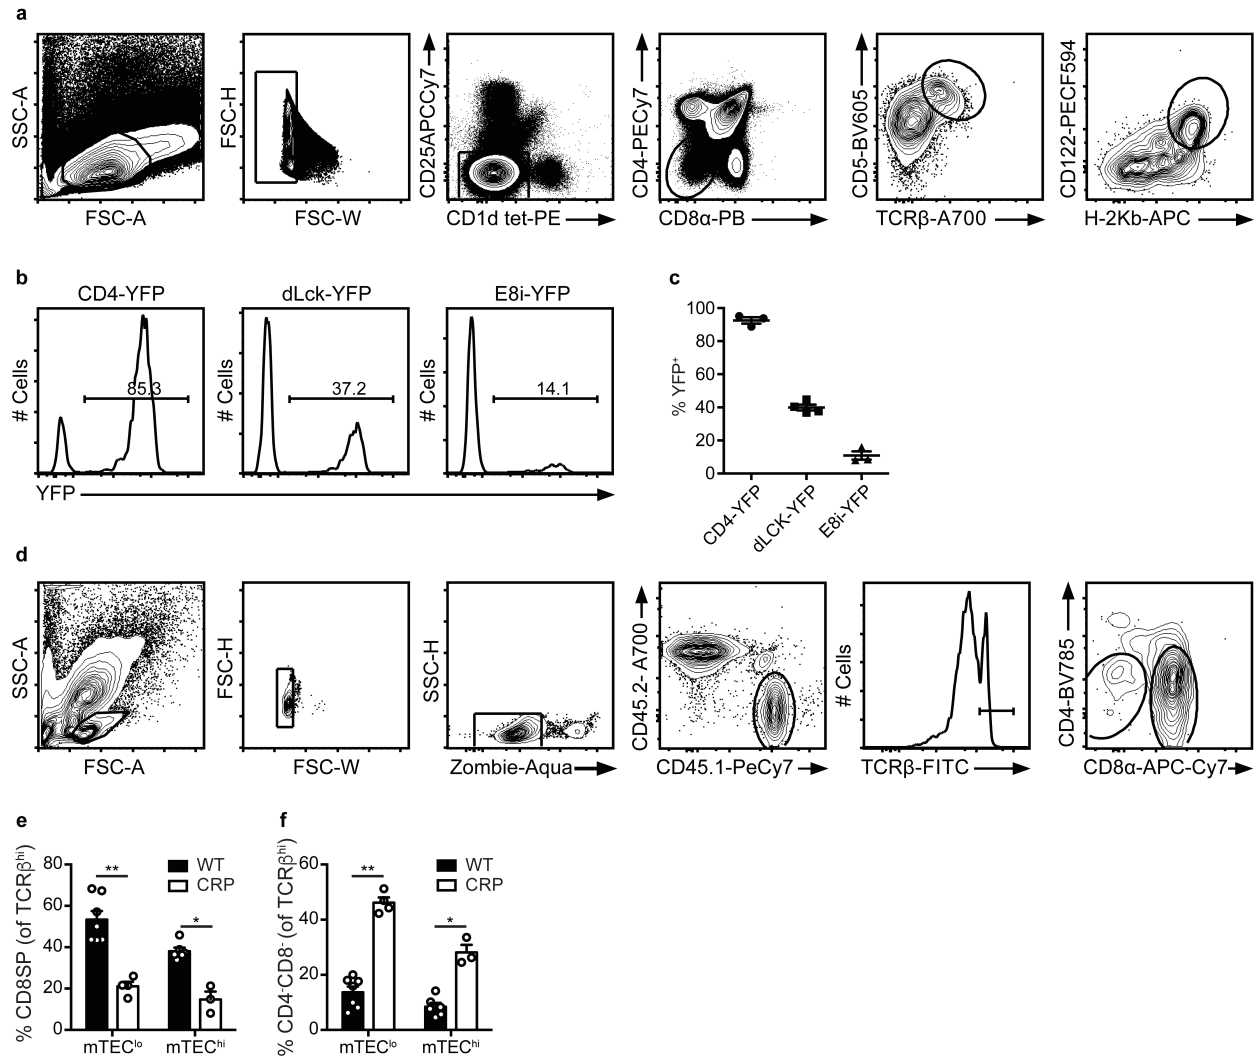

**Supplementary Fig. 3.** (a) Gating strategy for the analysis of IEL precursors (IELp, CD25<sup>+</sup>CD1d tet<sup>+</sup>CD4<sup>+</sup>CD8α<sup>+</sup>CD5<sup>+</sup>TCRβ<sup>+</sup>CD122<sup>+</sup>H2Kb<sup>+</sup>) in the thymus for data presented in Supplementary Fig. 3b,c. (b) Representative histograms of YFP expression in CD4-YFP (left panel), dLck-YFP (middle panel), and E8i-YFP (right panel) mice after gating on IELp. (c) Compilation of the proportion of YFP<sup>+</sup> cells within IELp from CD4-YFP, dLck-YFP, and E8i-YFP mice (mean ± SEM, n = 3 CD4-YFP, 4 dLck-YFP, and 3 E8i-YFP mice). (d) Gating strategy for the analysis of the OT-I thymocytes (CD45.1<sup>+</sup>CD45.2<sup>-</sup>) cultured with mTEC<sup>lo</sup> or mTEC<sup>hi</sup> cells presented in Supplementary Fig. 3e,f. (e) Proportion of CD8SP and (f) CD4<sup>+</sup>CD8<sup>-</sup> DN among the TCRβ<sup>hi</sup> OT-I thymocytes cultured with mTEC<sup>lo</sup> or mTEC<sup>hi</sup>. Data from panels e and f are pooled from at least three independent experiments and for each experiment, eight mice were pooled together to sort the mTEC<sup>lo/hi</sup> cells (mean ± SEM, n = 7 mTEC<sup>lo</sup> WT, 4 mTEC<sup>lo</sup> CRP, 6 mTEC<sup>hi</sup> WT, and 3 mTEC<sup>hi</sup> CRP conditions, examined over three independent experiments). Statistical analyses were performed by two-tailed Mann-Whitney U test. \*p < 0.05, \*\*p < 0.01. Source data are provided as a Source Data file.

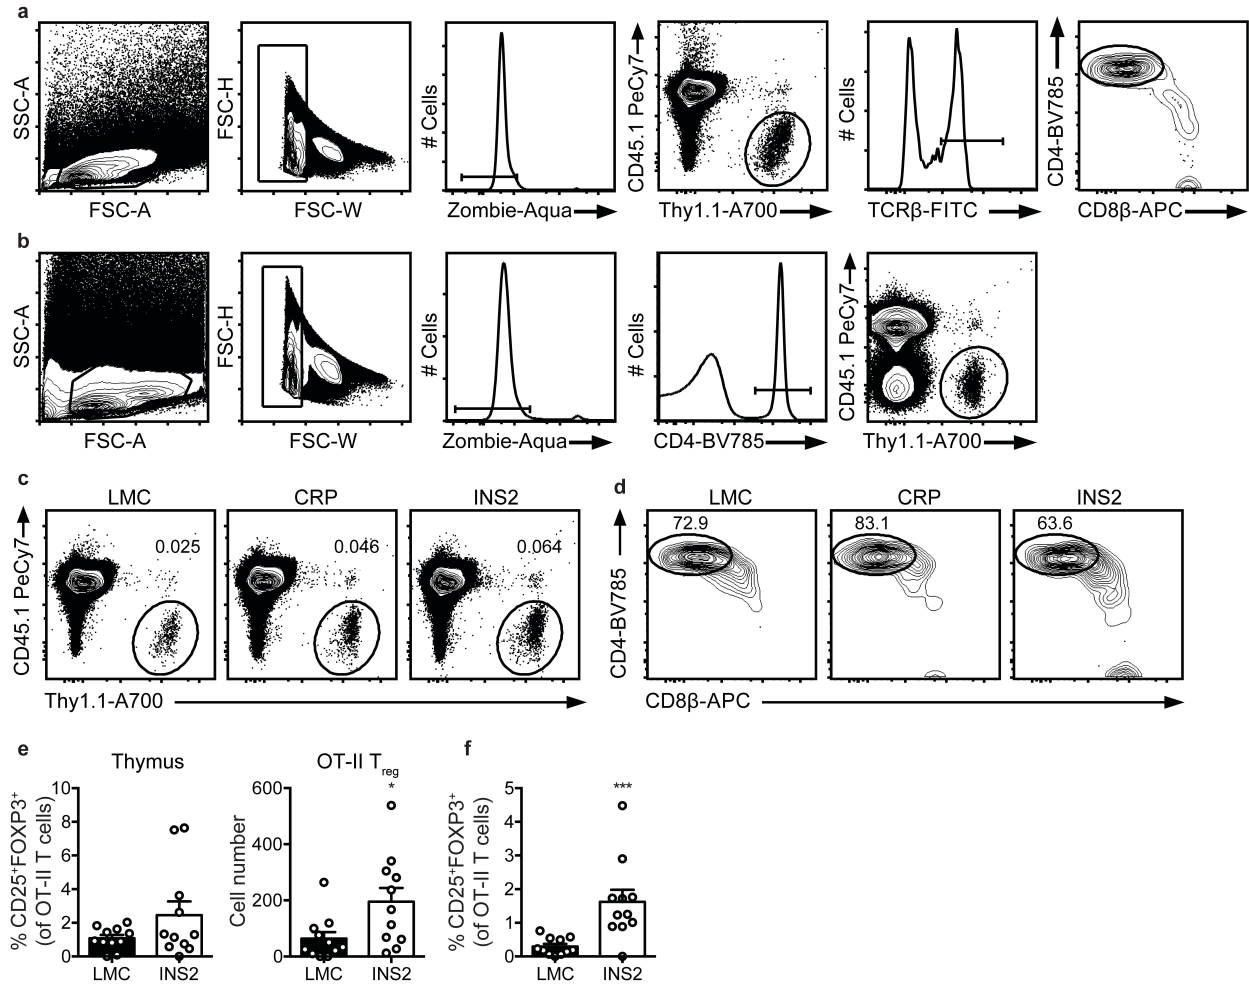

**Supplementary Fig. 4.** mTEC<sup>hi</sup>-restricted expression of USA preferentially induces T<sub>reg</sub> differentiation in a hematopoietic cell-independent manner. Littermate control (LMC), CRP, and INS2 mice (CD45.2, Thy1.2) were irradiated and reconstituted with 1% OT-II (CD45.2, Thy1.1) and 99% WT (CD45.1, Thy1.2) bone marrow. The hematopoietic chimeras were analyzed 6-8 weeks post-irradiation. Gating strategy for the analysis of OT-II cells (CD45.1<sup>+</sup>Thy1.1<sup>+</sup>) isolated from the thymus (**a**) or the lymph nodes (**b**) of the hematopoietic chimeras presented in Fig. 4a-e and Supplementary Fig. 4c-f. (**c**) Representative flow plots of CD45.1 and Thy1.1 expression on total live cells from the thymus. (**d**) Representative flow plots of CD4 and CD8 $\beta$  expression on live TCR $\beta$ <sup>hi</sup> OT-II thymocytes. LMC and INS2 recipient mice (CD45.1.2, Thy1.2) were irradiated and reconstituted with 1% OT-II (CD45.2, Thy1.1) and 99% MHCII KO CD1d-deficient (CD45.2, Thy1.2) bone marrow. The proportion (left panel) and number (right panel) of CD25<sup>+</sup> FoxP3<sup>+</sup> cells of OT-II T cells in the thymus (**e**) and lymph nodes (**f**) 6-8 weeks post-irradiation (mean  $\pm$  SEM, n = 11 mice per group, examined over three independent experiments). Statistical analyses were performed by two-tailed Mann-Whitney U test. \*p < 0.05, \*\*\*p < 0.001. Source data are provided as a Source Data file.

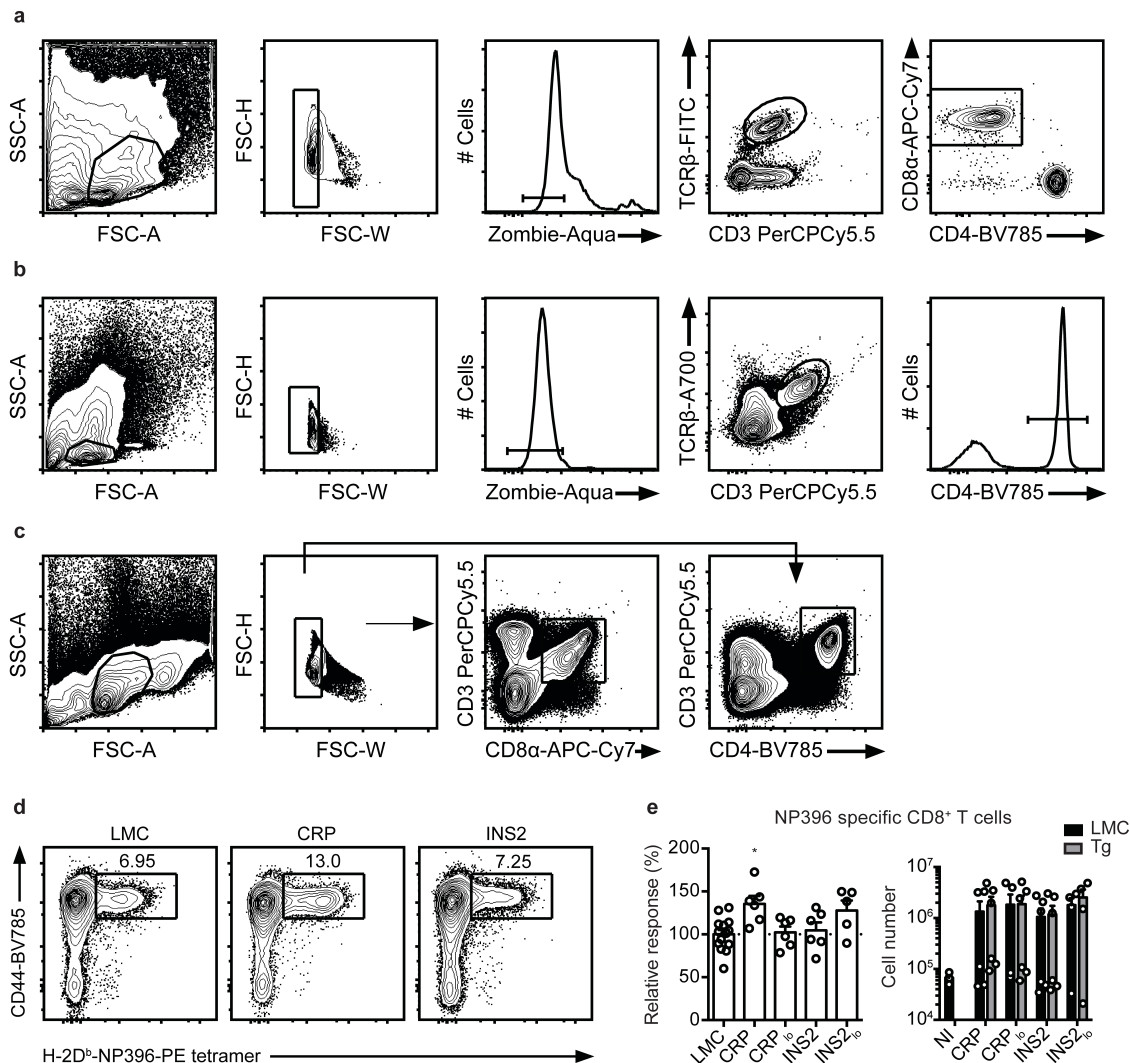

**Supplementary Fig. 5.** Gating strategy for the analysis of the polyclonal CD8 (a) and CD4 (b) T cell repertoire in naïve mice presented in Fig. 5a-i. (c-e) Mice were infected with LCMV-OVA and the antigen-specific response was measured in the spleen 8 days post-infection. (c) Gating strategy for the analysis of the CD4 and CD8 T cells response after LCMV infection before gating on the tetramer positive cells (corresponding to Fig. 6a-k and Supplementary Fig. 5d,e) (d) Representative CD44 and H-2D<sup>b</sup>-NP396 tetramer staining on CD8<sup>+</sup> T cells from the spleens of littermate controls (LMC), CRP, and INS2 mice. (e) Relative response (left panel) and absolute number (right panel) of NP396 specific CD8<sup>+</sup> T cell response in USA expressing mice as compared to LMC (mean +/- SEM, n = 14 LMC, 6 CRP, 6 CRP<sup>o</sup>, 6 INS2, and 5 INS2<sup>o</sup> mice, examined over three independent experiments). The p values indicated are calculated by Kruskal-Wallis test followed by Dunn's post-hoc comparisons to LMC, two-sided. \*p < 0.05 as compared to LMC. Source data are provided as a Source Data file.



|                             |                                                 | <b>CRP</b>  | <b>CRP<sup>lo</sup></b> | <b>INS</b> |
|-----------------------------|-------------------------------------------------|-------------|-------------------------|------------|
| Cell counts                 | Number of cells before filtering                | 13690       | 13575                   | 12583      |
|                             | Number of cells after filtering                 | 10173       | 11273                   | 7396       |
|                             | Proportion of cells kept with filtering         | 0,743097151 | 0,830423573             | 0,58777716 |
| Thresholds                  | Minimal gene number per cell                    | 252         | 351                     | 250        |
|                             | Maximal gene number per cell                    | 5467        | 5404                    | 5996       |
|                             | Minimal mitochondrial content                   | 0           | 0                       | 0          |
|                             | Maximal mitochondrial content                   | 7,5         | 7,5                     | 7,5        |
|                             | Minimal UMI number per cell                     | 0           | 0                       | 0          |
|                             | Maximal UMI number per cell                     | 22358       | 22597                   | 26427      |
| QC metrics before filtering | Minimal number of genes                         | 70          | 64                      | 113        |
|                             | Minimal number of UMIs                          | 504         | 500                     | 500        |
|                             | Minimal mitochondrial content                   | 0           | 0                       | 0          |
|                             | Maximal number of genes                         | 8172        | 8026                    | 8384       |
|                             | Maximal number of UMIs                          | 72387       | 59343                   | 68417      |
|                             | Maximal mitochondrial content                   | 93,49       | 92,71                   | 88,36      |
|                             | Mean number of genes                            | 2859,63     | 2877,53                 | 2793,21    |
|                             | Mean number of UMIs                             | 9343,77     | 9399,84                 | 9828,16    |
|                             | Mean mitochondrial content                      | 8,29        | 6,41                    | 11,99      |
|                             | Standard deviation in the number of genes       | 1303,58     | 1263,44                 | 1601,27    |
|                             | Standard deviation in the number of UMIs        | 6507,13     | 6598,33                 | 8299,6     |
|                             | Standard deviation in the mitochondrial content | 12,35       | 11,16                   | 15,25      |
| QC metrics after filtering  | Minimal number of genes                         | 308         | 358                     | 317        |
|                             | Minimal number of UMIs                          | 504         | 505                     | 500        |
|                             | Minimal mitochondrial content                   | 0           | 0                       | 0          |
|                             | Maximal number of genes                         | 5467        | 5404                    | 5985       |
|                             | Maximal number of UMIs                          | 22345       | 22597                   | 26421      |
|                             | Maximal mitochondrial content                   | 7,5         | 7,5                     | 7,5        |
|                             | Mean number of genes                            | 3138,85     | 2980,04                 | 3410,99    |
|                             | Mean number of UMIs                             | 9999,71     | 9293,33                 | 11849,63   |
|                             | Mean mitochondrial content                      | 4,15        | 3,63                    | 4,36       |
|                             | Standard deviation in the number of genes       | 873,92      | 916,35                  | 1108,59    |
|                             | Standard deviation in the number of UMIs        | 4445,44     | 4573,24                 | 5871,55    |
|                             | Standard deviation in the mitochondrial content | 1,2         | 1,11                    | 1,4        |

Supplementary Table 1. Quality control metrics of single cell RNA sequencing data. QC: quality control, UMI: Unique Molecular Identifier
