# Supplementary material for: Differential expression of tissue-restricted antigens among mTEC is associated with distinct autoreactive T cell fates
Source: PubMed Central journal article supplement (PMC7381629; doi:10.1038/s41467-020-17544-3), 2020-07-24
Supplement: 41467_2020_17544_MOESM3_ESM.pdf [file 41467_2020_17544_MOESM3_ESM.pdf]

## Reporting Summary

Nature Research wishes to improve the reproducibility of the work that we publish. This form provides structure for consistency and transparency in reporting. For further information on Nature Research policies, see [Authors & Referees](#) and the [Editorial Policy Checklist](#).

### Statistics

For all statistical analyses, confirm that the following items are present in the figure legend, table legend, main text, or Methods section.

n/a Confirmed

- The exact sample size ( $n$ ) for each experimental group/condition, given as a discrete number and unit of measurement
- A statement on whether measurements were taken from distinct samples or whether the same sample was measured repeatedly
- The statistical test(s) used AND whether they are one- or two-sided  
*Only common tests should be described solely by name; describe more complex techniques in the Methods section.*
- A description of all covariates tested
- A description of any assumptions or corrections, such as tests of normality and adjustment for multiple comparisons
- A full description of the statistical parameters including central tendency (e.g. means) or other basic estimates (e.g. regression coefficient) AND variation (e.g. standard deviation) or associated estimates of uncertainty (e.g. confidence intervals)
- For null hypothesis testing, the test statistic (e.g.  $F$ ,  $t$ ,  $r$ ) with confidence intervals, effect sizes, degrees of freedom and  $P$  value noted  
*Give  $P$  values as exact values whenever suitable.*
- For Bayesian analysis, information on the choice of priors and Markov chain Monte Carlo settings
- For hierarchical and complex designs, identification of the appropriate level for tests and full reporting of outcomes
- Estimates of effect sizes (e.g. Cohen's  $d$ , Pearson's  $r$ ), indicating how they were calculated

*Our web collection on [statistics for biologists](#) contains articles on many of the points above.*

### Software and code

Policy information about [availability of computer code](#)

Data collection Flow cytometry : BD FACSDiva v8.0.3

Data analysis  
Flow cytometry: FlowJo v9.3  
Statistics: GraphPad Prism v6  
Single cell RNA sequencing: Cell Ranger version 3.0.1, the Seurat package v2.3

For manuscripts utilizing custom algorithms or software that are central to the research but not yet described in published literature, software must be made available to editors/reviewers. We strongly encourage code deposition in a community repository (e.g. GitHub). See the Nature Research [guidelines for submitting code & software](#) for further information.

### Data

Policy information about [availability of data](#)

All manuscripts must include a [data availability statement](#). This statement should provide the following information, where applicable:

- Accession codes, unique identifiers, or web links for publicly available datasets
- A list of figures that have associated raw data
- A description of any restrictions on data availability

The single-cell RNA-sequencing data have been deposited in NCBI Gene Expression Omnibus (GEO) and is accessible through GEO Series accession number GSE153288 [<https://www.ncbi.nlm.nih.gov/geo/query/acc.cgi?acc=GSE153288>]. The source data underlying Fig. 1b-d, g-l, k-m, Fig. 2b-f, Fig. 3b, d, f, g, i-l, Fig. 4a, b, d, e, Fig. 5b, c, e, g, l, Fig. 6b, d, f, h-k, Fig. 7a-e, Supplementary Fig. 1c-e, Supplementary Fig. 2e-p, Supplementary Fig. 3c, e, f, Supplementary Fig. 4e, f, and Supplementary Fig. 5e are provided as a Source Data file. All other data supporting the findings of this study are available within the article and its supplementary information files, or are available upon request to the authors.

## Field-specific reporting

Please select the one below that is the best fit for your research. If you are not sure, read the appropriate sections before making your selection.

- Life sciences     Behavioural & social sciences     Ecological, evolutionary & environmental sciences

For a reference copy of the document with all sections, see [nature.com/documents/nr-reporting-summary-flat.pdf](https://www.nature.com/documents/nr-reporting-summary-flat.pdf)

## Life sciences study design

All studies must disclose on these points even when the disclosure is negative.

|                 |                                                                                                                                                                                                                                                                                                                                                                                                                                     |
|-----------------|-------------------------------------------------------------------------------------------------------------------------------------------------------------------------------------------------------------------------------------------------------------------------------------------------------------------------------------------------------------------------------------------------------------------------------------|
| Sample size     | No calculations were performed to predetermine sample size. Sample size was determined to be adequate based on previous experience with similar experiments and on the magnitude and consistency of measurable differences between groups in order to reproducibly detect specific effects. Generally, two to three repeats with a minimum of 3 mice per group were used when possible. Sample size is shown in each figure legend. |
| Data exclusions | No data were excluded.                                                                                                                                                                                                                                                                                                                                                                                                              |
| Replication     | All attempts at replication were successful. Generally, two to three repeats with a minimum of 3 mice per group were used when possible. This information is provided in figure legends.                                                                                                                                                                                                                                            |
| Randomization   | Samples were not randomized. Mice were allocated to groups based on genotype. Whenever possible, animals were housed within the same cage and age-matched.                                                                                                                                                                                                                                                                          |
| Blinding        | Investigators were not blinded to mouse genotypes for planning of experiments and to ensure that appropriate sample size was achieved by sacrificing the minimum number of mice. However, for the tumor measurements, the genotype was not displayed to prevent bias in research.                                                                                                                                                   |

## Reporting for specific materials, systems and methods

We require information from authors about some types of materials, experimental systems and methods used in many studies. Here, indicate whether each material, system or method listed is relevant to your study. If you are not sure if a list item applies to your research, read the appropriate section before selecting a response.

### Materials & experimental systems

| n/a                                 | Included in the study                                           |
|-------------------------------------|-----------------------------------------------------------------|
| <input type="checkbox"/>            | <input checked="" type="checkbox"/> Antibodies                  |
| <input type="checkbox"/>            | <input checked="" type="checkbox"/> Eukaryotic cell lines       |
| <input checked="" type="checkbox"/> | <input type="checkbox"/> Palaeontology                          |
| <input type="checkbox"/>            | <input checked="" type="checkbox"/> Animals and other organisms |
| <input checked="" type="checkbox"/> | <input type="checkbox"/> Human research participants            |
| <input checked="" type="checkbox"/> | <input type="checkbox"/> Clinical data                          |

### Methods

| n/a                                 | Included in the study                              |
|-------------------------------------|----------------------------------------------------|
| <input checked="" type="checkbox"/> | <input type="checkbox"/> ChIP-seq                  |
| <input type="checkbox"/>            | <input checked="" type="checkbox"/> Flow cytometry |
| <input checked="" type="checkbox"/> | <input type="checkbox"/> MRI-based neuroimaging    |

## Antibodies

### Antibodies used

Anti-mouse CD3e, Biolegend, Cat# 100328, Clone# 145 2C11, lot# B218551  
 Anti-mouse CD4 , Biolegend, Cat# 100422, Clone# GK1.5, lot# B224943, 224943  
 Anti-mouse CD4 , Biolegend, Cat# 100552, Clone# RM4-5, lot# B240240, 247274  
 Anti-mouse CD8a, Biolegend, Cat# 100714, Clone# 53 6.7, lot# B227808, 237526  
 Anti-mouse CD8b, Biolegend, Cat# 126616, Clone# YTS156.7.7, lot# B219438  
 Anti-mouse CD25, Biolegend, Cat# 102026, Clone# PC61, lot# B195261, B220897  
 Anti-mouse/human CD44, Biolegend, Cat# 103059, Clone# IM7, lot# B226852, 237883  
 Anti-mouse CD45, Biolegend, Cat# 103125, Clone# 30-F11, lot# B223290  
 Anti-mouse CD45.1, Biolegend, Cat# 110730, Clone# A20, lot# B233222  
 Anti-mouse CD45.2, Biolegend, Cat# 109822, Clone# 104, lot# B202497, B252126  
 Anti-mouse CD80, Biolegend, Cat# 104722, Clone# 16-10A1, lot# B209474  
 Anti-mouse CD90.1, Biolegend, Cat# 202528, Clone# OX-7, lot# B224447  
 Anti-mouse CD16/32, Biolegend, Cat# 101321, Clone# 93, lot# B238512  
 Anti-mouse CD122, Biolegend, Cat# 123218, Clone# TM-b1, lot# B236204  
 Anti-mouse CD326, Biolegend, Cat# 118218, Clone# G8.8, lot# B222309  
 Anti-mouse CD279 (PD-1 ), Biolegend, Cat# 135231, Clone# 29F.1A12, lot# B239282, B248896  
 Anti-mouse I-A/I-E, Biolegend, Cat# 107630, Clone# M5/114.15.2, lot# B199458  
 Anti-mouse TCRb, Biolegend, Cat# 109206, Clone# H57 597, lot# B180751

Anti-mouse TCRb, Biolegend, Cat# 109224, Clone# H57 597, lot# B241002, B278726  
 Anti-mouse FoxP3, ThermoFisher Scientific, Cat# 53-4774-42, Clone# 150D/E4, lot# 1934576  
 Anti-mouse FoxP3, BDBiosciences, Cat# 562996, Clone# MF23, lot# 6019937  
 Anti-mouse TCR Va2, Biolegend, Cat# 127808, Clone# B20.1, lot# B179390  
 Anti-mouse TCR Vb5.1,5.2, Biolegend, Cat# 139508, Clone# MR9-4, lot# B231450  
 Anti-mouse Ly-51, Biolegend, Cat# 108312, Clone# 6C3, lot# B222434, B222435  
 Biotinylated Ulex Europaeus Agglutinin I, Vector Laboratories, Cat# B-1065, Clone# UEA-1, lot# Z0806  
 InVivoMAb anti-mouse Thy1, BioXcell, Cat# BE0212, Clone# CD90, lot# 489417S1  
 Anti-Mouse CD25 Purified Low Endotoxin Functional Formulation, Leinco Technologies, Cat# C1194, Clone# PC61, lot# 0518L315

## Validation

All antibodies are commercially available, validated by the manufacturer, and commonly used. They were only used on species for which they have been validated by the manufacturer. All antibodies replicate the staining provided by the manufacturer.

## Eukaryotic cell lines

### Policy information about [cell lines](#)

## Cell line source(s)

MC57G, (RRID ID : CVCL\_4985, Aden DP, Knowles BB. Immunogenetics, 1976), B16F10 (RRID ID : CVCL\_0159, Fidler IJ. Cancer Res.,1975), B16-OVA (Linardakis E, Bateman A, Phan V, et al., Cancer Res, 2002), and L929 fibroblast cell line (Earle WR, et al., J. Natl. Cancer Inst., 1943) were kindly provided by Dr Alain Lamarre (INRS-Institut Armand-Frappier, Laval, Quebec, Canada).

## Authentication

None of the cell lines used were authenticated.

## Mycoplasma contamination

The cell lines were not tested for mycoplasma contamination.

Commonly misidentified lines  
(See [ICLAC](#) register)

No cell lines used are listed in the database of commonly misidentified cell lines.

## Animals and other organisms

### Policy information about [studies involving animals](#); [ARRIVE guidelines](#) recommended for reporting animal research

## Laboratory animals

Mouse: C57BL/6, B6.SJL, Aire<sup>-/-</sup> (B6.129S2-Airetm1.1Doi/J) and b2M<sup>-/-</sup> (B6.129P2-B2mtm1Unc/J), OT-I Rag1-deficient (NIH:C57BL/6 Tg(OT I)Rag1<tm1Mom>), OT-II Rag1-deficient, P14 TCR Tg mice, MHCII<sup>-/-</sup>CD1d<sup>-/-</sup> (B6.129PS2-H2 dlabl-Ea/J x B6.129S6-Del(3Cd1d2-Cd1d1)1Sbp/J), CD4-YFP (B6.Cg-Gt(ROSA)26Sortm3(CAG-EYFP)Hze/Jv x B6.Cg-Tg(Cd4-cre)1Cwi/Bflu/J), dLCK-YFP (B6.Cg-Gt(ROSA)26Sortm3(CAG-EYFP)Hze/Jv x B6.Cg-Tg(Lck-icre)3779Nik/J), E8i-YFP (B6.Cg-Gt(ROSA)26Sortm3(CAG-EYFP)Hze/Jv x C57BL/6-Tg(Cd8a-cre)1Itan/J) and CRP, CRP<sup>lo</sup>, INS2 and INS2<sup>lo</sup> transgenic mice.  
 Male and female mice between 4 and 12 weeks old were used unless otherwise noted.

## Wild animals

No wild animals were used in the study.

## Field-collected samples

The study did not involve samples collected from the field.

## Ethics oversight

All animal protocols were approved by the local Animal Care Committee at the Maisonneuve-Rosemont Hospital in accordance with the Canadian Council on Animal Care guidelines.

Note that full information on the approval of the study protocol must also be provided in the manuscript.

## Flow Cytometry

### Plots

## Confirm that:

- The axis labels state the marker and fluorochrome used (e.g. CD4-FITC).
- The axis scales are clearly visible. Include numbers along axes only for bottom left plot of group (a 'group' is an analysis of identical markers).
- All plots are contour plots with outliers or pseudocolor plots.
- A numerical value for number of cells or percentage (with statistics) is provided.

### Methodology

## Sample preparation

Spleens and lymph nodes were dissociated using frosted glass slides, while single cell suspensions from the thymus were prepared using a glass tissue homogenizer. Red blood cells in spleens and thymus were lysed before analysis with Ack lysis buffer (0.15 M NH<sub>4</sub>Cl, 10mM KHCO<sub>3</sub>, 0.1mM Na<sub>2</sub>EDTA). To isolate IEL from the small intestine, the connective tissue, fat, Peyer's patches and feces were removed. One cm intestine pieces were incubated in RPMI media supplemented with 3% FBS, 5mM EDTA and 0.145mg/ml DL-Dithiotreitol (Sigma-Aldrich) for 20 minutes at 37C with agitation. The IEL were then isolated by shaking the small intestine pieces in RPMI media with 2mM EDTA followed by a 30% Percoll (GE Healthcare) gradient of the

released cells. For isolation of the thymic epithelial cells, the thymus was first cut into small pieces and pipetted up and down with a wide bore 1000 ul tip until cell release was no longer detectable. The remaining tissue was digested in RPMI media supplemented with 10% FBS, 10 mM HEPES, 0.25 mg/ml papain, 0.25 mg/ml collagenase D, 0.1 mg/ml DNase for 15 min at 37C.

|                           |                                                                                                                                                                                                                                                                                                                                                                                                                                                                                                                                                                                                                                                                                                                                                                                                                                                                                                                                                                                                                                                                                                                                                                                                                                                                                                                                                                                                                                                                                                                                                                                                                                                                                                                                                                                                                                                                                                                                                                                                                                                                                                                                                                                                                                                                                                |
|---------------------------|------------------------------------------------------------------------------------------------------------------------------------------------------------------------------------------------------------------------------------------------------------------------------------------------------------------------------------------------------------------------------------------------------------------------------------------------------------------------------------------------------------------------------------------------------------------------------------------------------------------------------------------------------------------------------------------------------------------------------------------------------------------------------------------------------------------------------------------------------------------------------------------------------------------------------------------------------------------------------------------------------------------------------------------------------------------------------------------------------------------------------------------------------------------------------------------------------------------------------------------------------------------------------------------------------------------------------------------------------------------------------------------------------------------------------------------------------------------------------------------------------------------------------------------------------------------------------------------------------------------------------------------------------------------------------------------------------------------------------------------------------------------------------------------------------------------------------------------------------------------------------------------------------------------------------------------------------------------------------------------------------------------------------------------------------------------------------------------------------------------------------------------------------------------------------------------------------------------------------------------------------------------------------------------------|
| Instrument                | Flow cytometry analyses were performed on a BDLSR Fortessa X20 or BDLSRII flow cytometer (BD Biosciences).                                                                                                                                                                                                                                                                                                                                                                                                                                                                                                                                                                                                                                                                                                                                                                                                                                                                                                                                                                                                                                                                                                                                                                                                                                                                                                                                                                                                                                                                                                                                                                                                                                                                                                                                                                                                                                                                                                                                                                                                                                                                                                                                                                                     |
| Software                  | BD FACSDiva software was used to collect the flow cytometry data. Data were then analyzed using FlowJo software (Tree Star).                                                                                                                                                                                                                                                                                                                                                                                                                                                                                                                                                                                                                                                                                                                                                                                                                                                                                                                                                                                                                                                                                                                                                                                                                                                                                                                                                                                                                                                                                                                                                                                                                                                                                                                                                                                                                                                                                                                                                                                                                                                                                                                                                                   |
| Cell population abundance | 40000 to 150000 cells were obtained post-sort. For the qPCR analysis, the cells were directly sorted into Trizol; purity was not assessed. For the single cell RNA sequencing, purity was approximately 99%.                                                                                                                                                                                                                                                                                                                                                                                                                                                                                                                                                                                                                                                                                                                                                                                                                                                                                                                                                                                                                                                                                                                                                                                                                                                                                                                                                                                                                                                                                                                                                                                                                                                                                                                                                                                                                                                                                                                                                                                                                                                                                   |
| Gating strategy           | <p>Fig. 1, mTEClo were gated as follows : FSC/SSC, singlets, CD45- EPCAM+, UEA-1+ Ly51-, CD80 lo I-A/I-E lo</p> <p>Fig. 1, mTEChi were gated as follows : FSC/SSC, singlets, CD45- EPCAM+, UEA-1+ Ly51-, CD80 hi I-A/I-E hi</p> <p>Fig. 1, TEC were gated as follows : FSC/SSC, singlets, CD45- EPCAM+</p> <p>Fig. 1, CFSE-labeled OT-I T cells overlaid on top of thymic slices were gated as follows : FSC/SSC, singlets, live, CD8a+, CD45.1+CD45.2-</p> <p>Fig. 2 and 3, CFSE-labeled OT-I thymocytes overlaid on top of thymic slices were gated as follows : FSC/SSC, singlets, live, CFSE+CD45.1-</p> <p>Fig. 2 and 3, OT-I thymocytes from the hematopoietic chimera were gated as follows : FSC/SSC, singlets, live, TCRb hi, CD45.1+CD45.2-</p> <p>Fig. 2 and 3, OT-I T cells from lymph nodes of the hematopoietic chimera were gated as follows : FSC/SSC, singlets, live, TCRb+CD3+, CD45.1+ CD45.2-</p> <p>Fig. 3, OT-I T cells isolated from the small intestine (IEL) were gated as follows : FSC/SSC, singlets, live, CD3+TCRb+, CD45.1+CD45.2-</p> <p>Fig. 4, OT-II thymocytes from the hematopoietic chimera were identified as follows : FSC/SSC, singlets, live, TCRb hi, CD90.1+, CD45.1-</p> <p>Fig. 4, OT-II T cells from the hematopoietic chimera were gated as follows : FSC/SSC, singlets, live, CD3+CD4+, CD90.1+CD45.1-</p> <p>Fig. 5, cells for the tetramer analysis in naïve mice were gated as follows : FSC/SSC, singlets, live, CD3+TCRb+, and CD8+ or CD4+</p> <p>Fig. 6, cells for the tetramer analysis in LCMV infected mice were gated as follows FSC/SSC, singlets, live, and CD8+ or CD4+ before visualizing the CD44+tetramer+ cells.</p> <p>Supplementary Fig. 1, B cells were gated as follows : FSC/SSC, singlets, CD45+TCRb-, CD19+</p> <p>Supplementary Fig. 1, Macrophages were gated as follows : FSC/SSC, singlets, CD45+TCRb-, F4/80+</p> <p>Supplementary Fig. 1, Dendritic cells were gated as follows : FSC/SSC, singlets, CD45+TCRb-, CD11c+</p> <p>Supplementary Fig. 3, IEL precursors were gated as follows: FSC/SSC, singlets, live, CD1d tet-CD25-, CD4-CD8a-, CD5+TCRb+, CD122+H2Kb+</p> <p>Supplementary Fig. 3, OT-I thymocytes cultured with mTEC were gated as follows: FSC/SSC, singlets, live, CD45.1+CD45.2-, TCRbhi</p> |

Tick this box to confirm that a figure exemplifying the gating strategy is provided in the Supplementary Information.
